# Supplementary material for: Evidence for a Behaviourally Measurable Perseverance Trait in Humans
Source: MDPI journal article supplement (doi:10.3390/bs11090123), 2021-09-09
Supplement: s1 [file s1]

**Supplementary Table S1.** Loadings for unrotated Factor Matrix: Extraction by Maximum Likelihood-method

|                                       | Factor |        |
|---------------------------------------|--------|--------|
|                                       | 1      | 2      |
| Hand grip endurance task time         | 0.765  | -0.168 |
| Cold pressor task time                | 0.714  | -0.217 |
| Impossible verbal reasoning task time | 0.330  | 0.526  |
| Thread and needle task time           | 0.556  | 0.303  |
| Boring video task time                | 0.361  | 0.245  |
| Impossible anagram task time          |        | 0.302  |

**Supplementary Table S2.** Partial correlation between sum-variables based on factor analysis and physical attributes; all analysis controlled for sex

|                                   | 1      | 2    | 3      | 4     | 5       |
|-----------------------------------|--------|------|--------|-------|---------|
| 1. "Physical" BP sum <sup>1</sup> | 1      |      |        |       |         |
| 2. "Mental" BP sum <sup>2</sup>   | 0.48** | 1    |        |       |         |
| 3. Hand grip strength             | 0.31*  | 0.17 | 1      |       |         |
| 4. Age                            | 0.12   | 0.08 | 0.35*  | 1     |         |
| 5. Height                         | -0.04  | 0.04 | 0.34*  | -0.28 | 1       |
| 6. Weight                         | 0.26   | 0.21 | 0.44** | 0.04  | 0.55*** |

\*p<0.05; \*\*p<0.01; \*\*\*p<0.001

<sup>1</sup> "Physical" sum has been formed by adding together cold pressor task time and hand grip endurance task time.

<sup>2</sup> "Mental" sum has been formed by adding together impossible verbal reasoning task time and thread and needle task time.

**Supplementary Table S3.** Descriptives of interbeat intervals (IBI) in different tasks in milliseconds (rounded to the nearest millisecond)

|                              | N  | Mean | SD  | Min | Max  |
|------------------------------|----|------|-----|-----|------|
| Cold pressor task IBI        | 53 | 727  | 130 | 519 | 1194 |
| Hand grip endurance task IBI | 54 | 682  | 139 | 480 | 1106 |
| Thread and needle task IBI   | 54 | 837  | 145 | 564 | 1186 |
| Verbal reasoning task IBI    | 53 | 851  | 152 | 591 | 1269 |
| Anagram task IBI             | 54 | 852  | 158 | 618 | 1285 |
| Boring video task IBI        | 54 | 931  | 171 | 634 | 1385 |

**Supplementary Table S4.** Correlations between interbeat intervals (IBI) in different tasks

|                                              | 1.     | 2.     | 3.     | 4.     | 5.     |
|----------------------------------------------|--------|--------|--------|--------|--------|
| 1. Boring video task IBI                     | 1      |        |        |        |        |
| 2. Cold pressor task IBI                     | 0.82** | 1      |        |        |        |
| 3. Hand grip endurance task IBI              | 0.78** | 0.67** | 1      |        |        |
| 4. Thread and needle task IBI                | 0.92** | 0.79** | 0.80** | 1      |        |
| 5. Impossible verbal reasoning task time IBI | 0.96** | 0.81** | 0.77** | 0.91** | 1      |
| 6. Impossible anagram task IBI               | 0.96** | 0.78** | 0.76** | 0.91** | 0.91** |

\*\*p<0.01

**Supplementary Table S5.** Correlations between traits (i.e. factor variables and corresponding sum variables) and interbeat intervals (IBI) during different tasks.

|                              | Factor 1 "physical"<br>BP | Factor 2 "mental" BP | "Physical" BP sum <sup>1</sup> | "Mental" BP s |
|------------------------------|---------------------------|----------------------|--------------------------------|---------------|
| Cold pressor task IBI        | 0.49***                   | -0.15                | 0.44**                         | 0.04          |
| Hand grip endurance task IBI | 0.38**                    | -0.05                | 0.33*                          | 0.05          |
| Verbal reasoning task IBI    | 0.35*                     | -0.08                | 0.31*                          | 0.02          |
| Anagram task IBI             | 0.21                      | -0.02                | 0.19                           | 0.04          |
| Thread and needle task IBI   | 0.31*                     | -0.07                | 0.30*                          | 0.05          |
| Boring video task IBI        | 0.34*                     | -0.04                | 0.31*                          | 0.04          |

\*p<0.05; \*\*p<0.01; \*\*\*p<0.001

<sup>1</sup> "Physical" BP sum has been formed by adding together cold pressor task time and hand grip endurance task time.

<sup>2</sup> "Mental" BP sum has been formed by adding together impossible verbal reasoning task time and thread and needle task time.
